# Supplementary material
Source: Springer Nature journal article supplement (https://www.springermedizin.de/resource/supplementary/12889_2012_5024_MOESM7_ESM.pdf/9493224)
Supplement: MOESM7 [file 9493224]

**Table 4**  
Factors predicting healthcare utilisation stratified by registration status

|                                                      | Migrants    |              | Registrants |              |
|------------------------------------------------------|-------------|--------------|-------------|--------------|
|                                                      | Adjusted OR | (95% C.I.)   | Adjusted OR | (95% C.I.)   |
| Female                                               | 1.80        | (1.00, 3.26) | 1.24        | (0.74, 2.07) |
| Age                                                  | 0.98        | (0.95, 1.01) | 1.00        | (0.97, 1.02) |
| Marital status                                       |             |              |             |              |
| Single/separated/widowed                             | 1           |              | 1           |              |
| Married                                              | 0.90        | (0.44, 1.86) | 0.72        | (0.38, 1.36) |
| Occupation                                           |             |              |             |              |
| Executive/ professional/ managerial                  | 0.69        | (0.23, 2.04) | 1.82        | (0.93, 3.55) |
| Ordinary worker                                      | 1           |              | 1           |              |
| Unemployed                                           | 0.94        | (0.47, 1.87) | 1.49        | (0.83, 2.67) |
| Education                                            |             |              |             |              |
| Primary or below                                     | 0.74        | (0.22, 2.41) | 2.85        | (1.11, 7.31) |
| Middle/high school                                   | 1           |              | 1           |              |
| College or above                                     | 0.63        | (0.33, 1.20) | 1.34        | (0.77, 2.34) |
| Self-reported chronic disease diagnosis <sup>3</sup> | 2.77        | (1.18, 6.52) | 3.29        | (1.84, 5.89) |
| Insurance status                                     |             |              |             |              |
| Uninsured                                            | 1           |              | 1           |              |
| Basic MIS only                                       | 1.40        | (0.70, 2.80) | 1.14        | (0.48, 2.74) |
| Additional MIS only                                  | 1.00        | (0.32, 3.11) | 2.64        | (0.76, 9.16) |
| Basic + Additional MIS                               | 1.55        | (0.65, 3.72) | 1.35        | (0.50, 3.62) |

Note: C.I. denotes lower and upper limit of 95% confidence interval.
